# Supplementary material
Source: publisher figshare collection journal article supplement (https://springernature.figshare.com/ndownloader/files/10821239)
Supplement: Supplementary file [file 10821239]

# Additional file 1

## APPENDIX 1:

**Proof of lemma 1:** Since  $g(p_{k+1})$  is a valid beta probability density, as in (2), its integration with respect to  $p_{k+1}$  will be one:

$$\begin{aligned} \int_{\mathbf{P}} g(p_{k+1}) dp_{k+1} &= \\ \int_{\mathbf{P}} \frac{\Gamma(a+b)}{\Gamma(a)\Gamma(b)} p_{k+1}^{a-1} (1-p_{k+1})^{b-1} dp_{k+1} &= 1. \end{aligned} \quad (\text{A1})$$

Hence,

$$\int_{\mathbf{P}} p_{k+1}^{a-1} (1-p_{k+1})^{b-1} dp_{k+1} = \frac{\Gamma(a)\Gamma(b)}{\Gamma(a+b)}. \quad (\text{A2})$$

After replacing  $g(p_{k+1})$  in (17),

$$\begin{aligned} K_1 &= \frac{\Gamma(a+b)}{\Gamma(a)\Gamma(b)} \int_{\mathbf{P}} p_{k+1}^{\mathbf{d}(\mathbf{X}_{k+1}, \mathbf{f}_s(\mathbf{X}_k)) + a - 1} \\ &\times (1-p_{k+1})^{n - \mathbf{d}(\mathbf{X}_{k+1}, \mathbf{f}_s(\mathbf{X}_k)) + b - 1} dp_{k+1}. \end{aligned} \quad (\text{A3})$$

Using (A2) and (A3),  $K_1$  is derived as in (17).

## APPENDIX 2:

**Proof of lemma 2:** It is well-known that the steady-state distribution of a time-homogeneous TPM is obtained from (18). The conditional TPM  $\mathbf{A}^{(s)}(k+1)$  in (15) is time-inhomogeneous, since each time has its own perturbation probability  $p_{k+1}$ . Since the prior distribution of  $p_{k+1}$  in (2) is the same for every  $k$ , integrating the conditional TPM  $\mathbf{A}^{(s)}(k+1)$ , for every  $k$ , over the prior distribution of  $p_{k+1}$  yields a time-homogeneous TPM with the  $(i, j)$ -th entry as

$$\begin{aligned} \mathbf{M}_{i,j}^{(s)} &= \int_{\mathbf{P}} \mathbf{A}_{i,j}^{(s)}(k+1) g(p_{k+1}) dp_{k+1} = \\ \int_{\mathbf{P}} g(p_{k+1}) p_{k+1}^{\mathbf{d}(\mathbf{x}^j, \mathbf{f}_s(\mathbf{x}^i))} (1-p_{k+1})^{n - \mathbf{d}(\mathbf{x}^j, \mathbf{f}_s(\mathbf{x}^i))} dp_{k+1}. \end{aligned} \quad (\text{A4})$$

Lemma 1 and (A4) result in (19).

## APPENDIX 3:

**Proof of lemma 3:** From (5), the normal-gamma prior for  $\theta_j(k)$  and  $\lambda_j(k)$  is

$$\begin{aligned} p(\theta_j(k), \lambda_j(k)|x_j(k)) &= p(\theta_j(k)|\lambda_j(k), x_j(k)) p(\lambda_j(k)) \\ &= \frac{1}{Z_0} \lambda_j(k)^{\alpha_0 - \frac{1}{2}} \exp\left(-\frac{\lambda_j(k)}{2} [\kappa_0(\theta_j(k) - \mu_j(k))^2 + 2\beta_0]\right), \end{aligned} \quad (\text{A5})$$

where

$$Z_0 = \left(\frac{2\pi}{\kappa_0}\right)^{\frac{1}{2}} \frac{\Gamma(\alpha_0)}{\beta_0^{\alpha_0}}. \quad (\text{A6})$$

The likelihood from (4) is

$$p(y_j(k)|\theta_j(k), \lambda_j(k)) = \frac{1}{(2\pi)^{\frac{1}{2}}} \lambda_j(k)^{\frac{1}{2}} \exp\left(-\frac{\lambda_j(k)}{2} (y_j(k) - \theta_j(k))^2\right).$$

Therefore, for the posterior,

$$\begin{aligned} p(\theta_j(k), \lambda_j(k)|y_j(k), x_j(k)) &\propto p(y_j(k)|\theta_j(k), \lambda_j(k)) p(\theta_j(k), \lambda_j(k)|x_j(k)) \\ &\propto \lambda_j(k)^{\alpha_0} \exp\left(-\frac{\lambda_j(k)}{2} [\kappa_0(\theta_j(k) - \mu_j(k))^2 + 2\beta_0 + (y_j(k) - \theta_j(k))^2]\right) \\ &\propto \lambda_j(k)^{\alpha_1 - \frac{1}{2}} \exp\left(-\frac{\lambda_j(k)}{2} [\kappa_1(\theta_j(k) - \eta_j(k))^2 + 2\beta_1]\right), \end{aligned}$$

where  $\kappa_1$ ,  $\alpha_1$ , and  $\beta_1$  are given in (21), and  $\eta_j(k)$  is defined by

$$\eta_j(k) = \frac{\kappa_0 \mu_j(k) + y_j(k)}{\kappa_0 + 1}. \quad (\text{A7})$$

Comparing (A7) with (A5), we see that the posterior also has the following normal-gamma density:

$$\begin{aligned} p(\theta_j(k), \lambda_j(k)|y_j(k), x_j(k)) &= \\ &= \frac{1}{Z_1} \lambda_j(k)^{\alpha_1 - \frac{1}{2}} \exp\left(-\frac{\lambda_j(k)}{2} [\kappa_1(\theta_j(k) - \eta_j(k))^2 + 2\beta_1]\right), \end{aligned} \quad (\text{A8})$$

where

$$Z_1 = \left(\frac{2\pi}{\kappa_1}\right)^{\frac{1}{2}} \frac{\Gamma(\alpha_1)}{\beta_1^{\alpha_1}}. \quad (\text{A9})$$

Since the posterior density in (A8) integrates to 1,

$$\int_{\Omega} \int_{\Lambda} \lambda_j(k)^{\alpha_1 - \frac{1}{2}} \exp\left(-\frac{\lambda_j(k)}{2} [\kappa_1(\theta_j(k) - \eta_j(k))^2 + 2\beta_1]\right) d\theta_j(k) d\lambda_j(k) = Z_1.$$

Finally,  $K_2$  in (20) can be written as

$$\begin{aligned}
 K_2 &= \frac{1}{(2\pi)^{\frac{1}{2}}} \frac{1}{Z_0} \int_{\Omega} \int_{\Lambda} \lambda_j(k)^{\alpha_1 - \frac{1}{2}} \exp\left(-\frac{\lambda_j(k)}{2} [\kappa_1(\theta_j(k) - \eta_j(k))^2 + 2\beta_1]\right) d\theta_j(k) d\lambda_j(k) \\
 &= \frac{1}{(2\pi)^{\frac{1}{2}}} \frac{Z_1}{Z_0} = \frac{1}{(2\pi)^{\frac{1}{2}}} \left(\frac{\kappa_0}{\kappa_1}\right)^{\frac{1}{2}} \frac{\Gamma(\alpha_1) \beta_0^{\alpha_0}}{\Gamma(\alpha_0) \beta_1^{\alpha_1}},
 \end{aligned}$$

which finishes the proof.
